# Supplementary material for: Targeted Next-Generation Sequencing Reveals Mutations in Non-coding Regions and Potential Regulatory Sequences of Calpain-3 Gene in Polish Limb–Girdle Muscular Dystrophy Patients
Source: Front Neurosci. 2021 Oct 14;15:692482. doi: 10.3389/fnins.2021.692482 (PMC8551377; doi:10.3389/fnins.2021.692482)
Supplement: Supplementary file 4 [file Table_3.XLSX]

## Sheet: Supplementary Table 3
Targeted next generation sequencing reveals mutations in non-coding regions and potential regulatory sequences of calpain-3 gene in Polish limb-girdle muscular dystrophy patients.
Anna Macias, Jakub Piotr Fichna, Malgorzata Topolewska, Maria Jolanta Rędowicz, Anna M. Kaminska, Anna Kostera-Pruszczyk
Supplementary Table 3
List of DNA sequences subjected to NGS
gene name:	position (reference genome: Genome Research Consortium human build 38 (GRCh38)):
CAPN3 (ENSG00000092529)	15:42348103-42412318
putative regulatory regions for CAPN3:
	15:42359359-42360400
	15:42286096-42288400
	15:42403404-42407010
	15:42413174-42415343
	15:42447832-42448914
	15:42461370-42461780
	15:42268408-42269784
	15:42455272-42459194
	15:42257308-42257315
	15:42454601-42454800
	15:42450543-42452166
	15:42171204-42171418
	15:42010047-42013373
	15:42679574-42680416
	15:42679403-42679552
	15:42459606-42460558
	15:42676297-42676336
	15:42650400-42650801
	15:42858663-42858812
	15:42165163-42165312
	15:42139063-42139252
	15:42577401-42578472
	15:42583623-42584800
	15:42581070-42582408
	15:42582601-42583054
	15:42373167-42376803
	15:42384723-42388043
	15:42365801-42367600
	15:42369790-42371802
	15:42391284-42397314
	15:42360671-42360971
	15:42363358-42364272
	15:42354378-42355672
	15:42362398-42362992
	15:42356741-42357557
	15:42357747-42358501
	15:42369200-42369401
	15:42347600-42348952
